# Supplementary material for: Pressure-induced polymerization and bandgap-adjustment of TPEPA
Source: Royal Society of Chemistry journal article supplement (doi:10.1039/d2ra01144a), 2022-01-01
Supplement: d2ra01144a1.pdf [file d2ra01144a1.pdf]

## Supporting Information

# Pressure-induced polymerization and bandgap-adjustment of TPEPA

Jun Han,<sup>a†</sup> Jieshun Cui,<sup>b†</sup> Qunfei Zheng,<sup>a</sup> Zhipeng Yan,<sup>a</sup> Yun Li,<sup>c</sup> Jian Chen,<sup>a</sup> Xiaodong Yao,<sup>a</sup> Guangyang Dai,<sup>a</sup> Shanmin Wang,<sup>a</sup> Ying Liu,<sup>\*a</sup> Hsing-lin Wang,<sup>\*b</sup> Yusheng Zhao,<sup>a,c</sup> and Jinlong Zhu<sup>\*a,c</sup>

### AFFILIATIONS

<sup>a</sup> Department of Physics, Southern University of Science and Technology, Shenzhen 518055, China.

<sup>b</sup> Department of Materials Science and Engineering, Southern University of Science and Technology, Shenzhen 518055, China.

<sup>c</sup> Academy for Advanced Interdisciplinary Studies, Southern University of Science and Technology, Shenzhen 518055, China.

Corresponding Author:

\* Ying Liu: liuy37@sustech.edu.cn

\* Hsing-lin Wang: wangxl3@sustech.edu.cn

\* Jinlong Zhu: zhujl@sustech.edu.cn

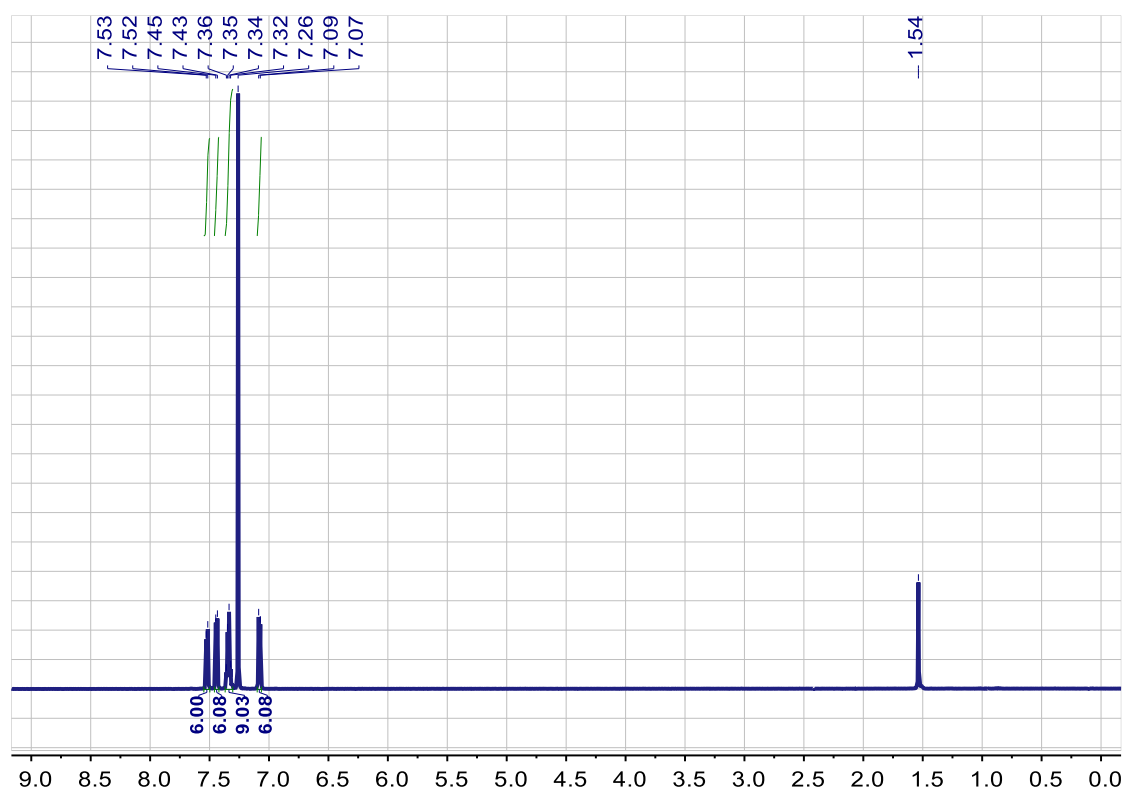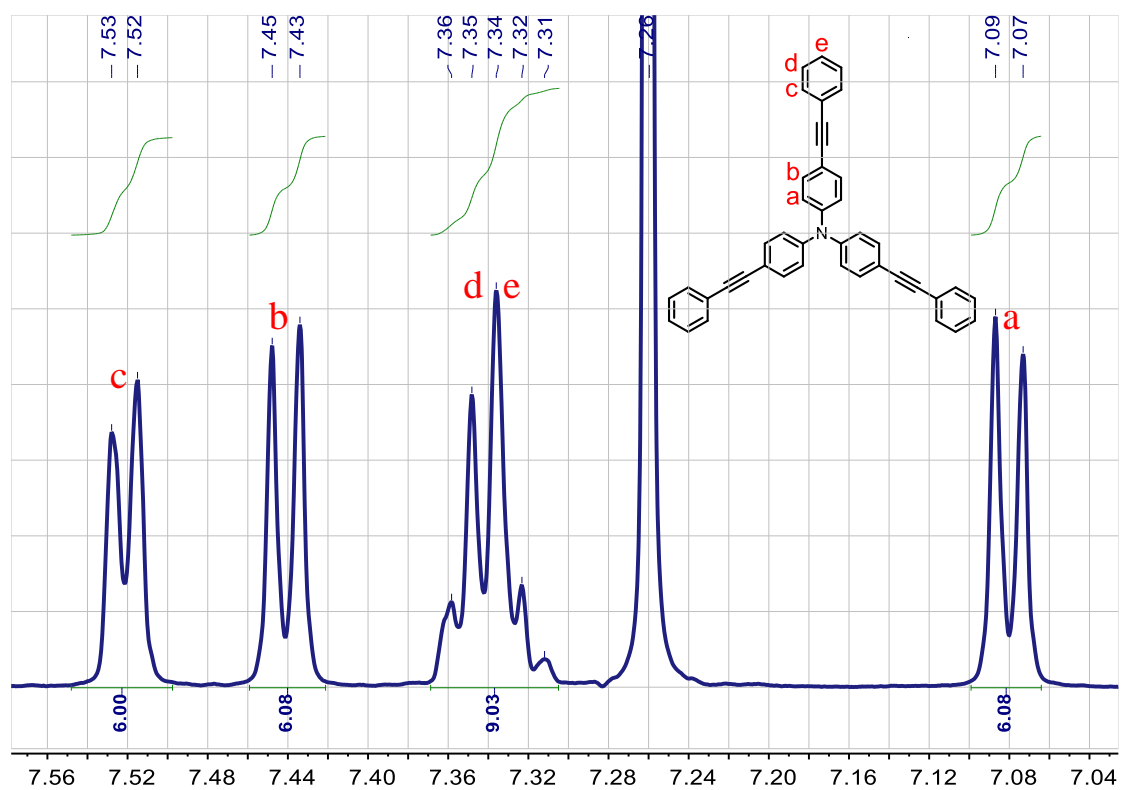

**Figure S1.** <sup>1</sup>H-NMR spectrum (600 MHz, CDCl<sub>3</sub>, 298K) of TPEPA (top). All peaks were assigned according to the chemical shift (bottom).

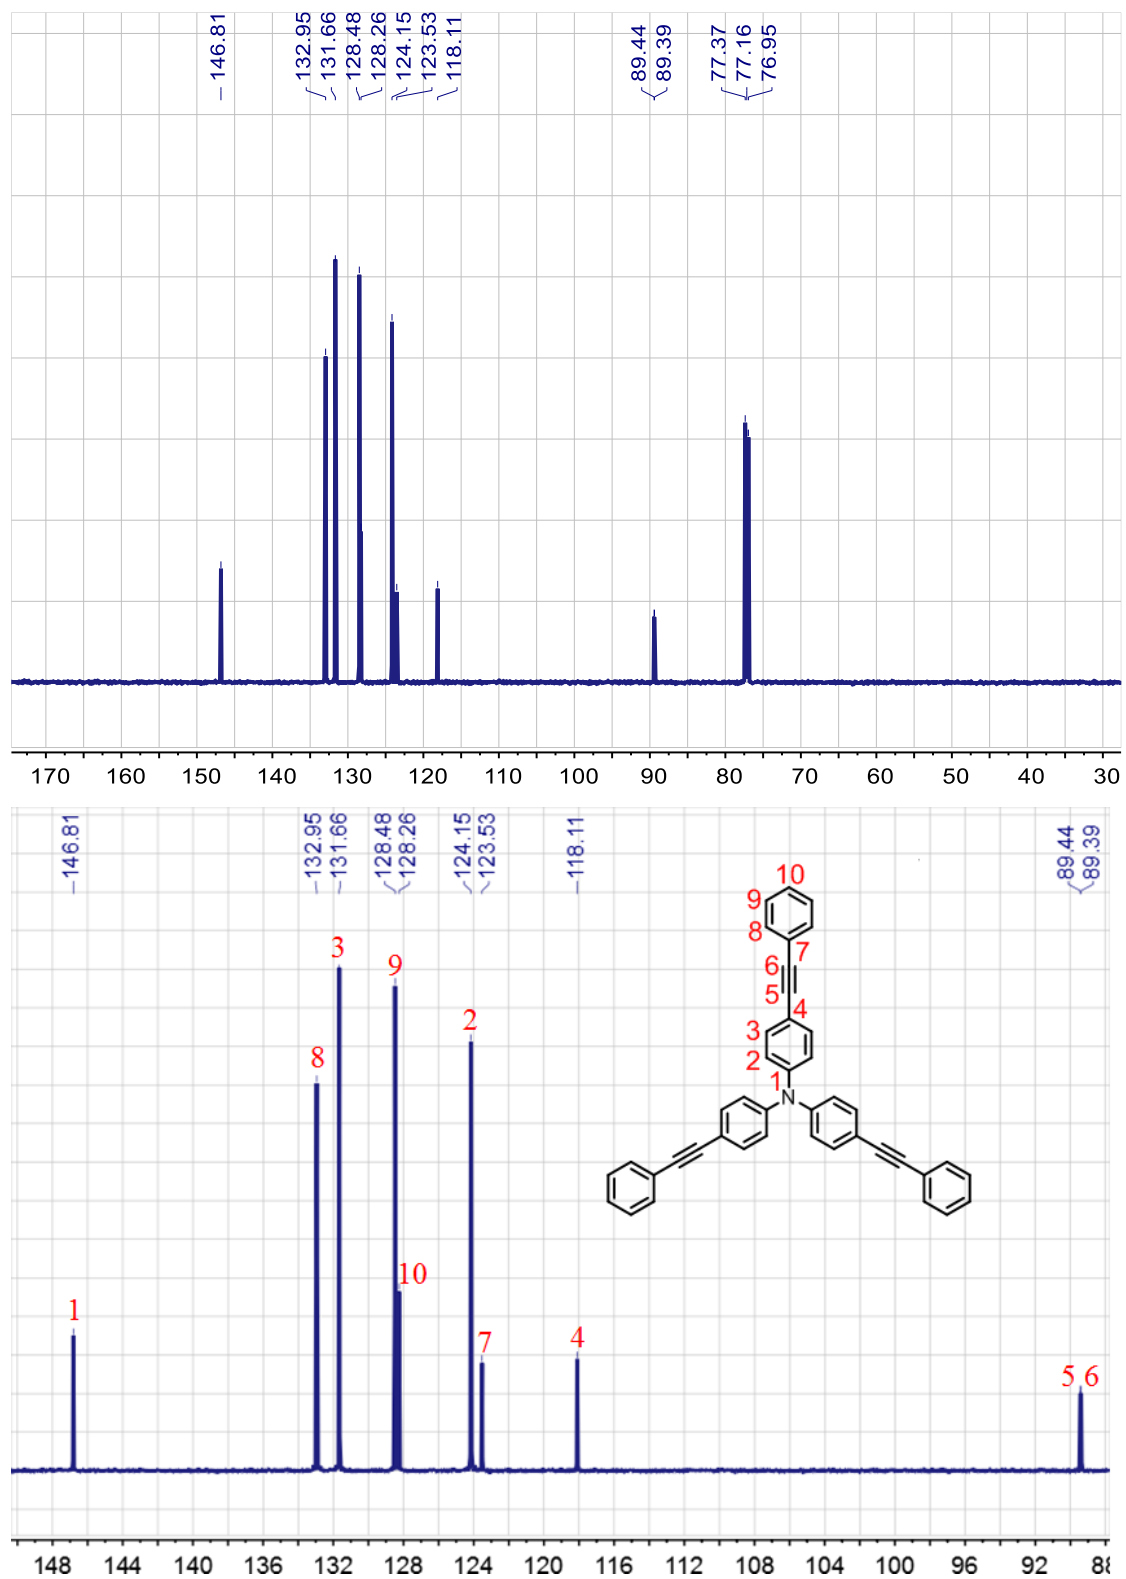

**Figure S2.**  $^{13}\text{C}$ -NMR spectrum (151 MHz,  $\text{CDCl}_3$ , 298K) of TPEPA(top). All peaks were assigned according to the chemical shift (bottom).

TPEPA\_211123143935 #5-12 RT: 0.06-0.12 AV: 4 NL: 9.01E6  
T: FTMS + p ESI Full ms [200.0000-800.0000]

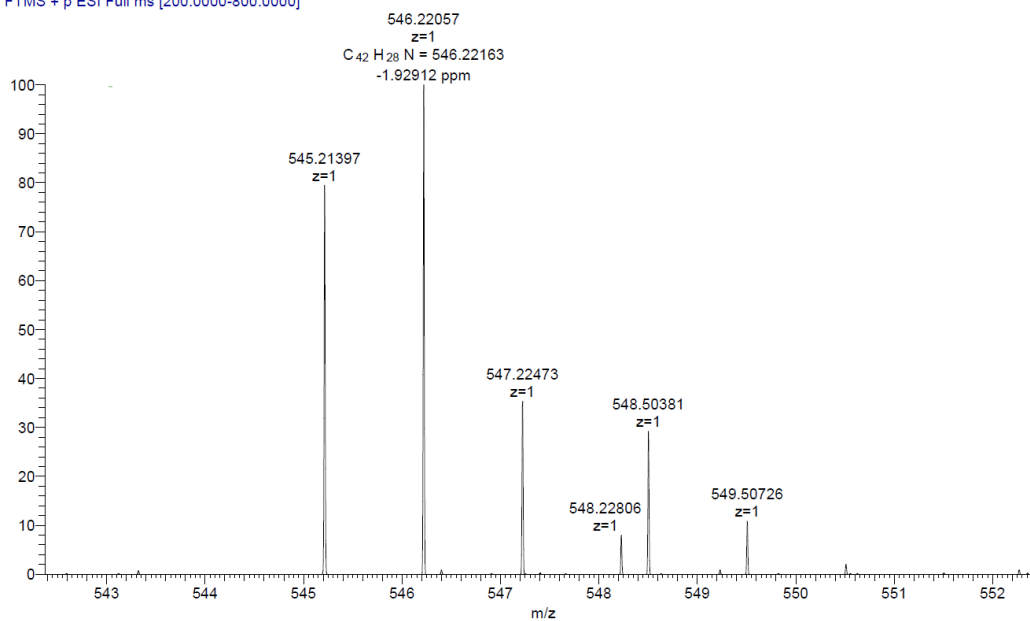

**Figure S3.** HR-MS spectrum of TPEPA: calculated  $[M+H]^+$  546.22163, found  $[M+H]^+$  546.22057.

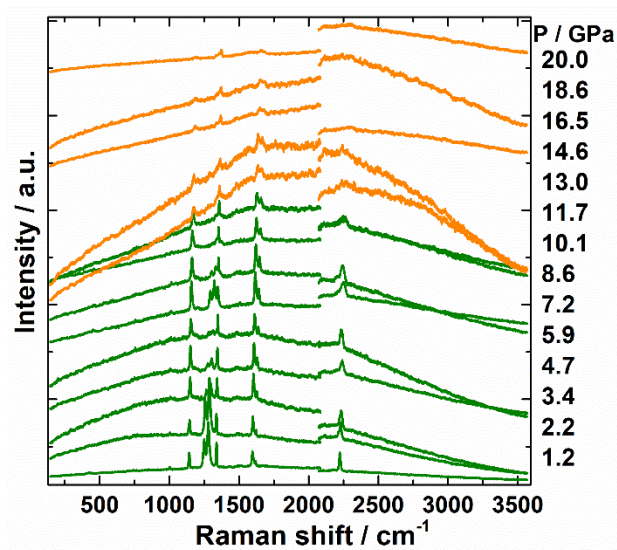

**Figure S4.** Raman spectra of TPEPA under the different high pressure.
